# Supplementary material for: Eye care delivery models to improve access to eye care for Indigenous people in high-income countries: protocol for a scoping review
Source: PubMed Central journal article supplement — BMJ Open. 2019 Jul 29;9(7):e029214. doi: 10.1136/bmjopen-2019-029214 (PMC6677968; doi:10.1136/bmjopen-2019-029214), 2019-07-29
Supplement: bmjopen-2019-029214supp001.pdf [file bmjopen-2019-029214supp001.pdf]

Burn, Black, Harwood et al. Eye care delivery models for Indigenous peoples.

## Supplementary File 1: Search strategy

### MEDLINE (Ovid)

1. exp Ophthalmology/
2. exp Eye Diseases/
3. (trachoma\$ or tracoma\$ or trichiasis).tw.
4. (cataract\$ or phaco\$ or phako\$).tw.
5. ((diabet\$ or proliferat\$) adj3 retinopath\$).tw.
6. (keratoconus or ectasia).tw.
7. (amblyop\$ or strabismus).tw.
8. exp Vision Tests/
9. Optometry/
10. (myop\$ or hyperop\$ or hypermetrop\$ or anisometrop\$ or ammetrop\$ or astigmati\$ or presbyop\$).tw.
11. (refractive adj1 error\$).tw.
12. Eyeglasses/
13. (spectacle or spectacles or glasses).tw.
14. (eyeglasses or eye glasses).tw.
15. ((eye\$ or vision or visual\$ or retina\$ or ophthalm\$ or retinopathy) adj2 exam\$).tw.
16. ((eye\$ or vision or visual\$ or retinopathy or ophthalm\$) adj2 assess\$).tw.
17. ((eye\$ or vision or visual\$ or retina\$ or ophthalm\$ or retinopathy) adj2 test\$).tw.
18. (eye\$ adj2 (care or health or service\$)).tw.
19. ((eye\$ or vision or visual\$) adj5 (culture\$ or cultural\$ or inequalit\$ or inequit\$ or disparit\$ or equit\$ or disadvantage\$ or depriv\$ or marginali\$ or minorit\$)).tw.
20. or/1-19
21. HEALTH SERVICES, INDIGENOUS/
22. OCEANIC ANCESTRY GROUP/
23. Indigenous.tw.
24. Aborigin\$.tw.
25. ATSI.tw.
26. Torres Strait Islander.tw.
27. ((first or native) adj1 people).tw.
28. (pacific adj2 island\$).tw.
29. Maori\$.tw.
30. Polynesian\$.tw.
31. Hawaiian.tw.
32. (Oceanic adj2 ancest\$).tw.
33. american native continental ancestry group/
34. ((American or native\$) adj2 Indian\$).tw.
35. (native adj2 Alaska\$).tw.
36. inuits/
37. (Inuit\$ or Aleut\$ or Eskimo\$ or Inupiat\$ or Kalaallit\$ or Metis\$).tw.
38. (first adj1 (nation or nations)).tw.
39. or/21-38
40. 20 and 39
41. (Indigenous adj3 (plant\$ or flora or tree\$ or material\$ or equip\$ or product\$ or produce\$ or bacteria\$ or infect\$)).tw.
42. (gene or genes or genotyp\$ or mutation\$ or sequenc\$).tw.
43. ROP.tw.
44. chlamydia.tw.
45. or/41-44
46. 40 not 45
47. exp case reports/
48. (case adj1 report\$).tw.
49. 47 or 48
50. 46 not 49

Burn, Black, Harwood et al. Eye care delivery models for Indigenous peoples.

### Embase (Ovid)

1. ophthalmology/
2. exp eye disease/
3. (trachoma\$ or tracoma\$ or trichiasis).tw.
4. (cataract\$ or phaco\$ or phako\$).tw.
5. ((diabet\$ or proliferat\$) adj3 retinopath\$).tw.
6. (keratoconus or ectasia).tw.
7. (amblyop\$ or strabismus).tw.
8. vision test/
9. visual system examination/
10. optometry/
11. (myop\$ or hyperop\$ or hypermetrop\$ or anisometrop\$ or ammetrop\$ or astigmati\$ or presbyop\$).tw.
12. (refractive adj1 error\$).tw.
13. spectacles/
14. (spectacle or spectacles or glasses).tw.
15. (eyeglasses or eye glasses).tw.
16. ((eye\$ or vision or visual\$ or retina\$ or ophthalm\$ or retinopathy) adj2 exam\$).tw.
17. ((eye\$ or vision or visual\$ or retinopathy or ophthalm\$) adj2 assess\$).tw.
18. ((eye\$ or vision or visual\$ or retina\$ or ophthalm\$ or retinopathy) adj2 test\$).tw.
19. (eye\$ adj2 (care or health or service\$)).tw.
20. ((eye\$ or vision or visual\$) adj5 (culture\$ or cultural\$ or inequalit\$ or inequit\$ or disparit\$ or equit\$ or disadvantage\$ or depriv\$ or marginali\$ or minorit\$)).tw.
21. or/1-20
22. indigenous health care/
23. transcultural care/
24. indigenous people/
25. Oceanic ancestry group/
26. Indigenous.tw.
27. Aborigin\$.tw.
28. ATSI.tw.
29. Torres Strait Islander.tw.
30. ((first or native) adj1 people).tw.
31. (pacific adj2 island\$).tw.
32. Maori\$.tw.
33. Polynesian\$.tw.
34. Hawaiian.tw.
35. (Oceanic adj2 ancest\$).tw.
36. american native continental ancestry group/
37. ((American or native\$) adj2 Indian\$).tw.
38. (native adj2 Alaska\$).tw.
39. exp Eskimo/
40. (Inuit\$ or Aleut\$ or Eskimo\$ or Inupiat\$ or Kalaallit\$ or Metis\$).tw.
41. (first adj1 (nation or nations)).tw.
42. or/22-41
43. 21 and 42
44. (Indigenous adj3 (plant\$ or flora or tree\$ or material\$ or equip\$ or product\$ or produce\$ or bacteria\$ or infect\$)).tw.
45. (gene or genes or genotyp\$ or mutation\$ or sequenc\$).tw.
46. ROP.tw.
47. chlamydia.tw.
48. or/44-47
49. 43 not 48
50. exp case report/
51. (case adj1 report\$).tw.
52. 50 or 51
53. 49 not 52

Burn, Black, Harwood et al. Eye care delivery models for Indigenous peoples.

### Global Health (Ovid)

1. eyes/
2. eye diseases/
3. vision/
4. vision disorders/
5. (trachoma\$ or tracoma\$ or trichiasis).tw.
6. (cataract\$ or phaco\$ or phako\$).tw.
7. ((diabet\$ or proliferat\$) adj3 retinopath\$).tw.
8. (keratoconus or ectasia).tw.
9. (amblyop\$ or strabismus).tw.
10. (myop\$ or hyperop\$ or hypermetrop\$ or anisometrop\$ or ammetrop\$ or astigmati\$ or presbyop\$).tw.
11. (refractive adj1 error\$).tw.
12. (spectacle or spectacles or glasses).tw.
13. (eyeglasses or eye glasses).tw.
14. ((eye\$ or vision or visual\$ or retina\$ or ophthalm\$ or retinopathy) adj2 exam\$).tw.
15. ((eye\$ or vision or visual\$ or retinopathy or ophthalm\$) adj2 assess\$).tw.
16. ((eye\$ or vision or visual\$ or retina\$ or ophthalm\$ or retinopathy) adj2 test\$).tw.
17. (eye\$ adj2 (care or health or service\$)).tw.
18. ((eye\$ or vision or visual\$) adj5 (culture\$ or cultural\$ or inequalit\$ or inequit\$ or disparit\$ or equit\$ or disadvantage\$ or depriv\$ or marginali\$ or minorit\$)).tw.
19. or/1-18
20. indigenous people/
21. aborigines/ or alaska natives/ or american indians/ or inuit/ or pacific islanders/
22. Indigenous.tw.
23. Aborigin\$.tw.
24. ATSI.tw.
25. Torres Strait Islander.tw.
26. ((first or native) adj1 people).tw.
27. (pacific adj2 island\$).tw.
28. Maori\$.tw.
29. Polynesian\$.tw.
30. Hawaiian.tw.
31. (Oceanic adj2 ancest\$).tw.
32. exp Oceania/
33. ((American or native\$) adj2 Indian\$).tw.
34. (native adj2 Alaska\$).tw.
35. Pacific Islands/
36. (Inuit\$ or Aleut\$ or Eskimo\$ or Inupiat\$ or Kalaallit\$ or Metis\$).tw.
37. (first adj1 (nation or nations)).tw.
38. or/20-37
39. (Indigenous adj3 (plant\$ or flora or tree\$ or material\$ or equip\$ or product\$ or produce\$ or bacteria\$ or infect\$)).tw.
40. (gene or genes or genotyp\$ or mutation\$ or sequenc\$).tw.
41. ROP.tw.
42. chlamydia.tw.
43. or/39-42
44. 19 and 38
45. 44 not 43
46. man.od.
47. 45 and 46
48. animals.od.
49. birds.od.
50. plants.od.
51. or/48-50
52. 47 not 51
53. case reports/
54. (case adj1 report\$).tw.
55. 53 or 54
56. 52 not 55
